# Supplementary material for: Bronze Age copper ingots from the Domažlice region compared with the Mutěnín copper ore deposit in western Bohemia (Central Europe)
Source: Research Square preprint supplement (doi:10.21203/rs.3.rs-6507188/v1), 2025-04-28
Supplement: Supplementary file 1 [file 9b9a6ae5cc33034c559b5131.docx]

# Supplementary materials to

**Bronze Age copper ingots from the Domažlice region compared with the Mutěnín copper ore deposit in western Bohemia (Central Europe)**

**J. Kmošek, M. Augustýnová, M. Fikrle, Y. V. Erban Kochergina**

**Detailed description of the used analytical methods and the methodology of measurements**

## X-ray powder diffraction analysis

Powder X-ray diffraction (XRD) was used for a mineralogical analysis of the samples. The samples were gently pulverized under acetone in an agate mortar. The powder X-ray diffraction data were collected on a Bruker D8 Advance powder diffractometer in a Bragg-Brentano geometry. Cu*Kα* radiation and Lynx Eye XE detector were used. The data were collected in the angular range 4-80° of 2Θ with a 0.015° step and 1 sec time per step.

The qualitative phase analysis was performed using the Diffrac. Eva program (Bruker AXS, 2015). The subsequent quantitative phase analysis was performed by the Rietveld method. The program Topas 5 (Bruker AXS, 2014) was used. The crystal structures of mineral phases used in the refinement were obtained from the ICSD database. During the Rietveld refinement, only the scale factors, unit-cell parameters, and size of coherent-diffracting domains were refined. A correction for preferred orientation of calcite was applied. The results are presented in OSM3.

## Instrumental neutron activation analysis

Due to the nature of the samples, instrumental neutron activation analysis (INAA) can be used as the primary analytical method. The use of (micro) destructive analytical methods is not yet widespread in our (i.e. Czech) archaeometry.

First, it was necessary to divide the samples into two groups. The first was characterised as metal artefacts, the second as minerals. Samples of metal artefacts are in the possession of various institutions such as museums, the Institute for Archaeological Heritage, etc. Therefore, the sub-sampling of these artefacts had to be authorised and the number of collection sites was limited (as was the final quantity of material). This is one of the limiting factors for data evaluation, as knowledge of the homogeneity of the artefacts is scarce and difficult to obtain - especially for ingots. Only one site could be sampled from each artefact. A small tungsten carbide microdrill (1 to 2 mm) was used for sampling. The total amount of material drilled ranged from 5 to 20 mg depending on the nature and weight of the primary artefact. In cases where the primary artefact was small, the sample taken was less than 5 mg (less than one in the extreme cases).

The second group involved the study of mineralogical samples collected by the authors for appropriate final sample processing. The samples were crushed in a set of plastic bags using a mechanical press with a pressure of approximately 0.5 to 1 tonne (up to a maximum of 5 tonnes). The plastic was used to protect against contamination. Sieving was then carried out using two sets of analytical sieves. This procedure allowed three different coarsenesses to be analysed, but only the finest and second finest fractions were analysed. The mineralogical samples we sampled was much larger than is appropriate for an INAA sample. The total amount was approximately 1.5 g with an inferred copper concentration greater than 10 wt%. A theoretical sample could therefore contain about 100 mg of copper. Irradiation of such a sample will produce an activity of almost 200 MBq at measurement day. There are two main problems. First, we are not able to measure this activity on our systems under standard conditions. The second problem is the radiation protection of the operator. The dose rate of this sample (still simplified to pure copper) is about 400 microsieverts per hour at standard working distance (20 cm). This is unacceptable from a radiation protection point of view. Therefore, we have to prepare a much smaller sample and have decided to use crushing. The sieving was partly the result of crushing. After crushing, there were visibly different parts in the sample, so it was useful to use sieves to separate them. We used two sieves (i.e. three fractions) of 0.5 and 0.16 mesh. Only two of them - the finest and the medium - were used for the analysis. We assumed that the finest one would have the highest copper concentration. Therefore, the concentration of other elements that may be part of the final ingot may be underestimated. We therefore decided to analyse the middle fraction, which might help us to correct this slightly.

As mentioned above, INAA was used. The weighed sample (metals and minerals) was sealed in a small PE capsule. The weight of the metal and mineral samples was approximately 5 mg and 45 mg respectively. The sample set together with standards and reference materials were packed in an irradiation capsule and irradiated in the LVR15 nuclear reactor. The thermal neutron flux was 8·1013 n·cm-2·s-1 and the samples were irradiated for 120 minutes. The irradiated samples were measured three times approximately 5, 10 and 30 days after irradiation. The measured spectra were evaluated in DEIMOS software and the final results were calculated for the following elements: Fe, Cu, Ni, Zn, Sn, As, Sb, Cr, Co, Ag, Au, Se and U. For quality control of the whole process, standard reference materials were irradiated, measured and evaluated under the same conditions as the unknown samples. The results are presented in Table 1 and Table 3.

## Energy dispersive X-ray fluorescence analysis

In this study, X-ray fluorescence analysis (ED-XRF) was used as a complementary method to INAA for both metals and minerals, but on different equipment. For metals this was a laboratory ED-XRF system and for minerals a portable system (actually also ED-XRF). A description of the portable system is given in Section 1.4.

The metal artefacts were first abraded to remove the corrosion layer. The abraded area was usually round with a maximum diameter of 1 to 2 mm. The depth varied but the aim was to ensure that only the corrosion layer was removed. Measurements were taken on the part of the abraded area that was visually cleanest (i.e. the corrosion was most likely to have been removed). The prepared sample was measured using a Spectro Midex (3rd generation) with an automatic stage for sample placement. This model is equipped with a He flushing system (not used for these samples) so that the distance between the sample and the detector is 2 mm. Different collimators can be used, a square one with a 0.1 mm edge was used. The measurement conditions were as follows: voltage 40 kV, current 0.5 mA and time 900 s. For the evaluation, the Spectro X-labPro system was used with the "standard based fundamental parameters" calculation algorithm. The following elements were analysed: Fe, Cu, Ni, Zn, Sn, Pb, As, Sb, Bi, Co, Ag and Au. The results are presented in Table 3.

## Portable X-Ray fluorescence analysis

The concentrations of SiO2, Al2O3, MnO, MgO, CaO, K2O, TiO2, P2O5 and S were determined by the pXRF method on samples of ground and homogenised mineral samples pressed into starch tablets. The samples were analysed with the portable X-ray fluorescence spectrometer Bruker S1 Titan 600 (Bruker, USA). The parameters of the X-ray fluorescence analysis were as follows: voltage 15/40 kV; current 27/10 μA; time of each measurement 180 s; graphene window silicon drift detector; Rh target X-ray tube and 3 mm collimator. The spectra obtained were evaluated using the Bruker Artax software. Quantification was made using the internal calibration standards (geochemical analysis). The results are presented as a part of the Table 1.

## Magnetic sector field Inductively Coupled Plasma Mass Spectrometry

Concentration of Pb and Bi of all mineralogical samples and selected ingots samples were analysed through their stable isotopes (208Pb and 209Bi) using a magnetic sector field ICP-MS (Element2, Thermo Scientific), equipped with a double pass quartz spray chamber, a PFA microflow nebulizer (Elemental Scientific) and a peristaltic pump for sample uptake. Samples were diluted in 2% HNO3 before analysis. External calibration was applied using a three-point calibration line prepared from certified calibration solutions (CPAchem), and a blank solution. A solution of 10 µg/L indium was mixed with both samples and calibration standards via a Y-piece before entrance to the nebulizer and 115In was used as an internal standard to correct for instrument drift. The results are presented in Tables 1.

## High resolution multicollector-Inductively Coupled Plasma Mass Spectrometry

Stable lead isotope ratios of the copper ore samples were analysed by the method of Multicollector-Inductively Coupled Plasma Mass Spectrometry (MC-ICP-MS). All geological and metallic samples were analysed using the Thermo Scientific Neptune mass spectrometer housed at Czech Geological Survey in Prague. For the measurements, the solutions with a lead concentration of 100 ng/ml were prepared after dissolution of the solid samples and chemical separation of the lead. For the separation of lead, the samples were rinsed with 2M HNO3 to remove surface contamination. Samples used for Pb isotope analyses are dissolved in a mixture of ultrapure (Romil®) HNO3 and 6M HCl (1:1 v/v) in single-use, pre-cleaned poly vials, and are gently evaporated at 60 °C to dryness. The residue completely dissolves in 4 ml of 6 M HCl. Insoluble residues were removed by centrifugation.

Dissolved samples are stored in 6 M HCl. One day before the first separation step, the solution aliquot is transferred to a new beaker, evaporated to dryness, and dissolved in 1.5 ml 2 M HNO3. Sr resin was used for Pb separation (Erban Kochergina et al. 2022). The Pb fraction was eluted using the 6M HCl and then gently evaporated at 60°C to dryness.

The MC-ICPMS is run in static low-resolution mode, using Faraday detectors and 1011Ω amplifiers. A quartz dual cyclone spray chamber with micro concentric 50 µl nebulizer is utilized for sample introduction, which provides at least 4.5 V at 208Pb for 100 ppb lead concentration. Samples for Pb isotopic analysis are spiked with NIST SRM 997 thallium reference material and the mass bias is corrected with the generalized power law using 205Tl/203Tl = 2.3871 (Ridley 2005). Ideally, the signal intensities of 204Pb and 205Tl should be equal. The reported data are the uncertainty-weighted mean of at least three replicate measurements and are corrected by a standard–sample bracketing approach relative to NIST declared values for the SRM 981 reference material (Košler 2008). Potential 204Hg isobaric interference on 204Pb is monitored at mass 202 (202Hg) and corrected by assuming natural Hg isotope ratios (202Hg/204Hg = 4.35) (Zadnik et al. 1989). External reproducibility of Pb isotopic measurements is given by repeat analyses of NIST SRM 981 isotopic standard (206Pb/204Pb = 16.931±50; 207Pb/204Pb = 15.490±22; 208Pb/204Pb = 36.688±124; 208Pb/206Pb = 2.166±2; 207Pb/206Pb = 0.9146±7; n = 117, Erban Kochergina et al. 2022). Results of lead isotope ratios analysis are listed in the Table 2.

**Tab. S1** Summary of analysed copper ores and artefacts made of copper alloys with specification of the extent and type of performed analysis.

| Analysed sample | Type of sample | LIA | ICP-MS (Pb, Bi) | XRD | ED-XRF | pXRF | INAA |
| --- | --- | --- | --- | --- | --- | --- | --- |
| Drahotin_P89.482 | copper ingot | x | x |  | x |  | x |
| Drahotin_P89.483 | copper ingot | x | x |  | x |  | x |
| Drahotin_P89.484 | copper ingot |  |  |  | x |  | x |
| Drahotin_P89.485 | copper ingot | x | x |  | x |  | x |
| Drahotin_P89.486 | copper ingot |  |  |  | x |  | x |
| Drahotin_P89.487 | copper ingot | x | x |  | x |  | x |
| Drahotin_P89.488 | copper ingot |  |  |  | x |  | x |
| Drahotin_P89.489 | copper ingot | x | x |  | x |  | x |
| Drahotin_P89.490 | copper ingot |  |  |  | x |  | x |
| Drahotin_P89.491 | copper ingot |  |  |  | x |  | x |
| Drahotin_P89.492 | copper ingot |  |  |  | x |  | x |
| Drahotin_P89.493 | copper ingot |  |  |  | x |  | x |
| Drahotin_P89.494 | copper ingot | x | x |  | x |  | x |
| Drahotin_P89.495 | copper ingot | x | x |  | x |  | x |
| Kout na Sumave_P89.886 | copper ingot |  |  |  | x |  | x |
| Havlovice_11 | copper ingot |  |  |  | x |  |  |
| Havlovice_12 | copper ingot | x | x |  |  |  | x |
| MUT_01 | secondary copper ore | x | x | x |  | x | x |
| MUT_02 | primary copper ore | x | x | x |  | x | x |
| MUT_03 | primary copper ore | x | x | x |  | x | x |
| MUT_04 | secondary copper ore | x | x | x |  | x | x |
| MUT_05 | primary copper ore | x | x |  |  | x | x |
| MUT_12 | secondary copper ore | x | x |  |  | x | x |

**Tab. S2** Results of XRD analysis of the samples mineralogical composition given in weight %.

| **Sample** | **Quartz** | **Malachite** | **Chalcopyrite** | **Brochantite** | **Calcite** |
| --- | --- | --- | --- | --- | --- |
| SiO2 | Cu2(OH)2CO3 | CuFeS2 | Cu4[(OH)6SO4] | CaCO3 |
| **MUT_01** | 96 | 4 |  |  |  |
| **MUT_02** | 20 |  | 80 |  |  |
| **MUT_03** | 4 |  | 96 |  |  |
| **MUT_04** | 22 | 60 |  | 16 | 2 |

**Tab. S2** Results of INAA analysis of reference standards. Results are given in weight % and µg.g-1.

| Reference standard | **INAA No** | **Fe** | **Cu** | **Ni** | **Zn** | **Sn** | **As** | **Sb** | **Cr** | **Co** | **Ag** | **Au** | **Se** |
| --- | --- | --- | --- | --- | --- | --- | --- | --- | --- | --- | --- | --- | --- |
|  |  | wt. % | | µg.g-1 | | | | | | | | | |
| LB10 | 6118 | 0.25 | 77.77 | 17443 | 3279 | 96723 | 2133 | 1105 |  | 54.00 | 66 |  |  |
| standard | 0.21 | 75.00 | 18500 | 3200 | 97000 | 2230 | 1120 |  | ? | ? |  | ? |
| GM4 | 6119 |  | 83.66 | 19156 | 68496 | 24788 | 208 | 416 |  | 3262.00 | 59 |  | 121 |
| standard | 0.05 | 82.60 | 20500 | 71700 | 25000 | 210 | 420 |  | ? | 62 |  | ? |
| SN7B | 6122 |  | 84.77 | 2938 | 11719 | 136237 | 11583 | 2526 |  | 3400.00 | 3259 |  | 734 |
| standard | 0.04 | 81.21 | 2760 | 11400 | 124500 | 11300 | 2350 |  | 3390.00 | 3280 |  | 660 |
| 31X 7835.8 (MO8) | 6120 |  | 69.98 | 1577 | 251660 | 5033 | 1326 | 1080 |  | 3136.00 | 4091 |  |  |
| standard | 0.10 | 69.93 | 1580 | 248300 | 5160 | 1430 | 1150 |  | 3130.00 | 4630 |  | ? |
| 31X 7835.9 (MO9) | 6121 | 0.47 | 80.68 | 1036 | 143535 | 13958 | 1018 | 3768 |  | 818.00 | 17797 |  | 3605 |
| standard | 0.41 | 78.48 | 1000 | 143400 | 14800 | 1070 | 4450 |  | 813.00 | 21200 |  | 3400 |
